# Supplementary material
Source: PubMed Central journal article supplement (PMC3774796)
Supplement: NIHMS491648-supplement-01.pdf [file NIHMS491648-supplement-01.pdf]

1 A.1.2. *Von Mises*. For the von Mises distribution, we have  $f(x, \mu) = K \times$  1  
 2  $\exp\{\kappa \cos(x - \mu)\}$ ,  $0 < x, \mu < 2\pi$ . The mode is  $\hat{x} = \mu$ ; thus,  $(\ell'')_{\hat{x}=\mu} = -\kappa$ , and 2  
 3 the approximation is  $X \simeq N(\mu, \frac{1}{\kappa})$ , which is a well-known normal approximation 3  
 4 to the von Mises distribution [Mardia and Jupp (2000), page 38]. 4  
 5

6 A.1.3. *Halfnormal-gamma*. For the halfnormal-gamma distribution, we have 6  
 7

$$\begin{aligned} \ell &= \log f(x; r, \nu, \delta) & 8 \\ &= \log K + (r - 1) \log x - \frac{1}{2} \nu x^2 + \delta x, & 9 \\ \ell' &= \frac{(r - 1)}{x} - \nu x + \delta & 10 \end{aligned}$$

11 and 11  
 12  
 13  
 14

$$\ell'' = -\frac{(r - 1)}{x^2} - \nu,$$

15 leading to an approximate variance given by  $\{\nu + \frac{(r-1)}{\hat{x}^2}\}^{-1}$ . Recall that the 15  
 16 mode is  $\hat{x} = \{\delta + \sqrt{\delta^2 + 4(r - 1)\nu}\}/2\nu$ . We therefore have the approximation 16  
 17  $X \simeq N(\hat{x}, \text{Var}(X))$ . We find the approximation to be better for larger  $r$  and  $\delta$ ; even 17  
 18 for small  $r$ , the approximation is good for positive values of  $\delta$ , but less good for 18  
 19 relatively large negative values of  $\delta$ . Further details are given in the supplementary 19  
 20 material. 20  
 21  
 22  
 23  
 24  
 25  
 26

27 **Acknowledgments.** Fallaize acknowledges EPSRC funding for his research 27  
 28 studies. We thank Peter Green for helpful comments, and the Editor, Associate 28  
 29 Editor and anonymous referee for their comments which helped to improve a pre- 29  
 30 vious version of the paper. 30  
 31

## 32 SUPPLEMENTARY MATERIAL 32

33  
 34 **Simulation methods and a normal approximation for the halfnormal-** 34  
 35 **gamma distribution** (DOI: [10.1214/12-AOAS615SUPP](https://doi.org/10.1214/12-AOAS615SUPP); .pdf). We describe an 35  
 36 acceptance-rejection method for simulating from the halfnormal-gamma distribu- 36  
 37 tion and investigate its efficiency over a range of parameter settings. We also in- 37  
 38 vestigate further the normal approximation to the halfnormal-gamma distribution, 38  
 39 which we use to obtain efficient proposals in our Metropolis updates. We show 39  
 40 that the approximation is best for parameter values where the acceptance-rejection 40  
 41 method is less efficient, and hence that the two simulation methods complement 41  
 42 each other well. 42  
 43
